# Supplementary material
Source: Springer Nature journal article supplement (https://www.springermedizin.de/resource/supplementary/12933_2007_99_MOESM1_ESM.pdf/9539588)

Without acarbose

Upper  
small  
intestine

Lower  
small  
intestine

Carbohydrate  
resorption

Carbohydrates

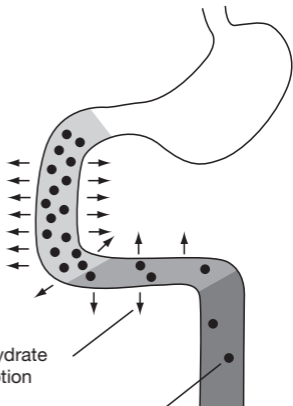

With acarbose

Upper  
small  
intestine

Lower  
small  
intestine

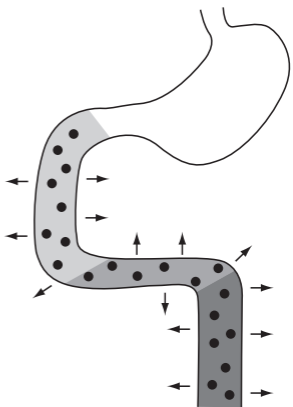

Supplement: MOESM1 [file 9539588]
